**Full title:** Automated Estimation of Computed Tomography-Derived Left Ventricular Mass Using Sex-specific 12-Lead ECG-Based Temporal Convolutional Network

**Short title:** Sex-specific ECG estimation of LV mass.

**Author list:**

Heng-Yu Pan, MD<sup>1,2,†</sup>; Benny Wei-Yun Hsu, MS<sup>3,†</sup>; Chun-Ti Chou, MS<sup>3</sup>; Chih-Kuo Lee, MD<sup>1</sup>; Wen-Jeng Lee, MD, PhD<sup>4</sup>; Tai-Ming Ko, PhD<sup>2</sup>; Tzung-Dau Wang, MD, PhD<sup>5,\*</sup>; Vincent S. Tseng, PhD<sup>3,\*</sup>

<sup>1</sup>Division of Cardiology, Department of Internal Medicine, National Taiwan University Hospital Hsin-Chu Branch, Hsin-Chu City, Taiwan;

<sup>2</sup>Department of Biological Science and Technology, National Yang Ming Chiao Tung University, Hsin-Chu City, Taiwan;

<sup>3</sup>Department of Computer Science, National Yang Ming Chiao Tung University, Hsin-Chu City, Taiwan;

<sup>4</sup>Department of Medical Imaging, National Taiwan University Hospital, Taipei City, Taiwan;

<sup>5</sup>Divisions of Cardiology and Hospital Medicine, Department of Internal Medicine, National Taiwan University Hospital, Taipei City, Taiwan

**Address for correspondence:**

1. Tzung-Dau Wang, MD, PhD, Cardiovascular Center and Divisions of Cardiology and Hospital Medicine, Department of Internal Medicine, National Taiwan University Hospital, No. 7, Zhong-Shan South Road, Taipei City, 100225, Taiwan. Tel: +886-2-2312-3456 ext. 265632; Fax: +886-2-2391-3682. E-mail: [tdwang@ntu.edu.tw](mailto:tdwang@ntu.edu.tw)

2. Vincent S. Tseng, PhD, Department of Computer Science, National Yang Ming Chiao Tung University, No. 1001, Daxue Rd, E District, Hsinchu, 300, Taiwan. Email [vtseng@cs.nctu.edu.tw](mailto:vtseng@cs.nctu.edu.tw)

<sup>†</sup>**These authors contributed equally to this work.**

**Word count of the abstract:** 334 words.

**Word count of the entire manuscript:** 5,931 words.

## 1 **Abstract**

## 2 **Background**

3 Left ventricular hypertrophy (LVH) is characterized by increased left ventricular myocardial  
4 mass (LVM) and is associated with adverse cardiovascular outcomes. Traditional LVH  
5 diagnosis based on rule-based criteria using limited electrocardiogram (ECG) features lacks  
6 sensitivity. Accurate LVM evaluation requires imaging techniques such as magnetic resonance  
7 imaging or computed tomography (CT) and provides prognostic information beyond LVH.  
8 This study proposed a novel deep learning-based method, the eLVMass-Net, together with sex-  
9 specific and various processing procedures of 12-lead ECG, to estimate CT-derived LVM.

10

## 11 **Methods**

12 1,459 ECG-LVM paired data were used in this research to develop a deep-learning model for  
13 LVM estimation, which adopted ECG signals, demographic information, QRS interval  
14 duration and absolute axis values as the input data. ECG signals were encoded by a temporal  
15 convolutional network (TCN) encoder, a deep neural network ideal for processing sequential  
16 data. The encoded ECG features were concatenated with non-waveform features for LVM  
17 prediction. To evaluate the performance of the predicting model, we utilized a 5-fold cross-  
18 validation approach with the evaluation metrics, mean absolute error (MAE) and mean absolute  
19 percentage error (MAPE).

20

## 21 **Results**

22 The eLVMass-Net has achieved an MAE of  $14.33 \pm 0.71$  and an MAPE of  $12.90\% \pm 1.12\%$ , with  
23 input of single heartbeat ECG waveform and lead-grouping. The above results surpassed the  
24 performance of best state-of-the-art method (MAE  $19.51 \pm 0.82$ ,  $P = 0.04$ ; MAPE  
25  $17.62\% \pm 0.78\%$ ;  $P = 0.07$ ) in 292( $\pm 1$ ) test data under 5-fold cross-validation. Adding the

26 information of QRS axis and duration did not significantly improve the model performance  
27 (MAE  $14.33 \pm 0.71$ ,  $P = 0.82$ ; MAPE  $12.90\% \pm 1.12\%$ ;  $P = 0.85$ ). Sex-specific models achieved  
28 numerically lower MAPE for both males ( $-2.71\%$ ,  $P=0.48$ ) and females ( $-2.95\%$ ,  $P=0.71$ ),  
29 respectively. The saliency map showed that T wave in precordial leads and QRS complex in  
30 limb leads are important features with increasing LVM, with variations between sexes.

31

## 32 **Conclusions**

33 This study proposed a novel LVM estimation method, outperforming previous methods by  
34 emphasizing relevant heartbeat waveforms, inter-lead information, and non-ECG demographic  
35 features. Furthermore, the sex-specific model is a rational approach given the distinct habitus  
36 and features in saliency map between sexes.

37

## 38 **Clinical Perspectives**

### 39 **What is new?**

- 40 ● The eLVMass-Net used ECG encoders with lead grouping, a unique feature that more  
41 properly reflects the electrical orientation of left ventricle.
- 42 ● The sex-specific deep learning model is able to discriminate inter-gender differences of  
43 ECG features as shown by saliency maps.

### 44 **What are the clinical implications?**

- 45 ● The eLVMass-Net outperforms current state-of-the-art deep learning models for  
46 estimating left ventricular mass.
- 47 ● A more accurate estimation of left ventricular mass could improve quality of care for  
48 comorbidities such as hypertension from easily accessible ECG.

49

## 50 **Abbreviations**

- 51 CNN: convoluted neuron network
- 52 LVH: left ventricular hypertrophy
- 53 LVM: left ventricular myocardial mass
- 54 MAE: mean absolute error
- 55 MAPE: mean absolute percentage error
- 56 ML: machine learning
- 57 MLP: multilayer perceptron
- 58 SOTA: state of the art
- 59 TCN: temporal convoluted network
- 60

## 61 **Introduction**

62 Left ventricular hypertrophy (LVH) is defined by an increased left ventricular myocardial  
63 mass (LVM), usually secondary to conditions with higher left ventricular afterload, such as  
64 hypertension or aortic stenosis. LVH is a dynamic pathophysiological phenomenon with  
65 concomitant changes in cardiomyocytes and interstitial fibrosis.<sup>1,2</sup> Further progressions in LVH  
66 are associated with diastolic dysfunction, arrhythmia as well as cardiac death.<sup>3-5</sup> Traditionally,  
67 the diagnosis of LVH relies on various rule-based criteria, mainly focusing on QRS voltage  
68 presented on individual electrocardiogram (ECG), which is a low-cost and convenient test.<sup>6</sup>  
69 Nonetheless, most of these criteria concentrate more on the features of R/S amplitudes, QRS  
70 duration, and qualitative ST and T wave changes, which often fall short of sensitivity.<sup>7-9</sup> It is  
71 not surprising considering the fact that magnetic resonance imaging (MRI)-based studies  
72 showed that commonly used criteria such as Sokolow-Lyon or Cornell indices are negatively  
73 correlated to the degree of left ventricular fibrosis.<sup>10</sup> It is thus necessary that comprehensive  
74 ECG features, as well as interactions between individual leads, be considered in order to  
75 encompass the electrophysiological traits.<sup>11</sup>

76 More precise evaluation of LVH typically requires accurate imaging evaluation of LVM.  
77 Both cardiac MRI and computed tomography (CT) are recommended as accurate measurement  
78 modalities of LVM and are able to provide additional prognostic value beyond LVH.<sup>12,13</sup>  
79 However, these imaging modalities are either time-consuming or flawed by radiation and  
80 contrast exposure. Also, such information provides anatomical rather than electrophysiological  
81 features.

82 In the past, machine learning (ML) models have been applied to ECG features generated  
83 through rule-based algorithms, but these methods have limitations in producing high-quality  
84 ECG features. To address this issue, some works employed learning-based techniques,

85 specifically deep learning models, to replace rule-based algorithms in ECG feature extraction.  
86 A few studies have made progress in LVM evaluation using ECG amplitude data or auto-  
87 segmented features.<sup>14-16</sup> Some studies take advantage of convolutional neural networks for  
88 heart disease (e.g., LVH) prediction.<sup>17,18</sup> The ecgAI model used a deep-learning model to  
89 automatically segment raw ECG signals into non-overlapping intervals and durations to  
90 generate ECG features.<sup>14</sup> This approach allowed for a more comprehensive analysis of the ECG  
91 signal, resulting in more accurate and reliable features. Furthermore, the LVM-AI model  
92 utilized an end-to-end training pipeline to estimate LVM using ECG signals and demographic  
93 data.<sup>16</sup> By incorporating demographic data in the analysis, they were able to improve the  
94 accuracy of LVM prediction. These deep learning methods that discriminate LVH may  
95 improve risk stratification and prompt early pharmacological intervention.<sup>19</sup>

96 Previous studies utilized full-length ECG signals and demographic data as the input for  
97 their models. However, it is difficult to ensure that the model is able to focus specifically on  
98 the waveform features that are related to LVM values or to extract inter-lead information such  
99 as the heart axis. In this study, to solve this problem, we developed a deep-learning model for  
100 LVM estimation based on the Taiwan CVAI dataset, which includes cardiac CT exams of over  
101 3,500 patients from major medical centers in Taiwan. We accessed demographic data, 12-lead  
102 ECG, and CT-derived LVM values, utilizing these data to construct an LVM estimation model.  
103 Meanwhile, we conducted a series of experiments to analyze the impact of sex, ECG  
104 preprocessing methods, and groupings for 12-lead ECGs according to different characteristics  
105 of model performance.

## 106 **Methods**

### 107 **Data Acquisition**

108           The dataset utilized in this study was obtained from the National Taiwan University  
109 Hospital and was approved by the institutional review board previously. This study was further  
110 approved by the Institutional Review Board of National Taiwan University Hospital (NTUH-  
111 REC No. 202012128RINA). The dataset consists of 12-lead ECG signals, recorded at a  
112 sampling rate of 500 Hz for 10 seconds and downloaded in XML format. The XML files also  
113 contain non-waveform information automatically generated by the ECG device, including heart  
114 axis and QRS duration, which are further integrated into input features. Pertinent demographic  
115 data such as age, sex, height, and weight are included. **Figure 1** shows the overall data  
116 collection and cleansing process. The LVM values were first obtained, and subsequently, the  
117 ECG XML file that was closest to the LVM measurement was selected as the corresponding  
118 ECG signal. Patients with bundle branch block, paced rhythm, or atrial fibrillation were  
119 excluded from the research.

120           The ground truth of LVM values was inferred from auto-segmentation of left ventricular  
121 wall from cardiac CT images, by using the Intellispace Portal Software (Philips Healthcare,  
122 The Netherlands). A threshold-based method was used to determine epicardial and endocardial  
123 borders, and the left ventricular myocardium was calculated automatically after obtaining both  
124 total ventricular volume and ventricular cavity volume. Mass value was further acquired after  
125 multiplying myocardial density by 1.05 g/mL. The results of left ventricle segmentation were  
126 verified by a senior radiologist (W.-J.L.) who is specialized in cardiac CT images and with  
127 more than 20 years' experience.

128           The dataset is divided into non-overlapping subsets for cross-validation. K-fold cross-  
129 validation was employed as a robust validation process to prevent sampling bias. In each  
130 iteration, a single fold was reserved as the test set ( $n=292\pm 1$ ), while a percentage of the  
131 training set ( $n=1051\pm 1$ ) was selected as the validation set ( $n=116\pm 1$ ) to assess model  
132 performance. The selection of the optimal model was based on the performance observed

133 during the validation stage. The final evaluation of the model was obtained by averaging the  
134 test results across all folds. All experiments in this research undergo validation using 5-fold  
135 cross-validation, which is stratified based on the LVM values. For sex-specific models, the  
136 original data splitting policy was followed, and the samples of the target gender were  
137 extracted to form the sub-datasets for training and evaluation.

138

### 139 **Data Processing**

140 We included demographic information (age, sex, height, and weight), and automatically  
141 derived numeric ECG values (P-axis, R-axis, T-axis, and QRS duration) for analysis. These  
142 data were represented as scalar values, resulting in a total of 8 scalar inputs for this task. Our  
143 research aimed to leverage both the ECG signals and non-ECG data to estimate the  
144 corresponding LVM value. cr data were addressed through an imputation method, with  
145 numerical data imputed with the median and binary categorical data with 0.5.

146 The ECG signals were in the form of a 12-lead signal with a shape of  $(L, D * Fs)$ , where  
147  $L$  represents the number of leads,  $D$  represents the signal duration in seconds, and  $Fs$  represents  
148 the sampling rate. This study improved the quality of 12-lead ECG signals through various  
149 preprocessing steps. The signals underwent a band-pass filter to eliminate high-frequency noise  
150 and baseline wandering. R peaks were then detected, and the middle heartbeat segment was  
151 selected to avoid incomplete segments caused by recording borderlines.

152

### 153 **eLVMass-Net**

154 This study has developed a novel deep learning-based method, the eLVMass-Net, which  
155 can accurately estimate LVM values using ECG and demographic information. The overview  
156 of the proposed framework is depicted in **Figure 2**. There are ECG feature extractors (i.e., the  
157 encoders for input data embedding) followed by a multilayer perceptron (MLP) layer. The



158 number of ECG encoders utilized in the model is dependent on the number of lead groups. The  
159 encoded ECG features from each ECG encoder were concatenated, and a projection layer was  
160 utilized to aggregate these features. The scalar features such as demographic data, axis, and  
161 QRS duration were passed through their own MLP layer. These two feature vectors were  
162 subsequently concatenated and fed into an MLP regressor to estimate the LVM value. To obtain  
163 ECG features, we took advantage of the Temporal Convolutional Networks (TCN) to encode  
164 ECG signals. Throughout the process of model training, the mean absolute error (MAE) was  
165 employed as the chosen loss function. The Adam optimizer, with a learning rate of 0.001, was  
166 utilized for model optimization. And with a maximum of 100 epochs, the model with the lowest  
167 validation loss was selected for testing to avoid overfitting.

168 Besides TCN, we also used EfficientNet for comparison to validate the performance of  
169 the convolutional neural network (CNN)-based methods with different characteristics.  
170 EfficientNet and TCN are two popular models used for image and signal processing.  
171 EfficientNet is proposed based on a CNN architecture, which has demonstrated exceptional  
172 performance in image classification tasks and even on ECG signals.<sup>20-22</sup> These models are  
173 designed using a compound scaling method that optimizes the network's depth, width, and  
174 resolution. The EfficientNet architecture also employs advanced techniques like squeeze-and-  
175 excitation modules and swish activations, which further enhance its performance. Meanwhile,  
176 TCN is a type of deep neural network that is ideal for processing sequential data, such as time-  
177 series signals. TCNs use dilated convolutions, enabling the network to capture long-term  
178 dependencies in the input sequence while maintaining a compact architecture. Our preliminary  
179 experiments revealed that EfficientNet-based ECG encoders had a tendency towards  
180 overfitting.

181

182 **Exploring ECG Pre-processing and Grouping Methods**

183 We explored the use of preprocessing techniques to guide the model to learn ECG  
184 features. We employed two preprocessing techniques, namely random length crop and single  
185 heartbeat extraction. The random length crop approach involves randomly selecting a segment  
186 of the ECG signal of varying lengths and using it as input to the model. This approach enables  
187 the model to learn features that are specific to different parts of the ECG waveform, which may  
188 be useful in capturing subtle changes in the signal. On the other hand, the single heartbeat  
189 extraction approach involves segmenting the ECG signal into individual heartbeats and using  
190 each beat as input to the model. This approach may help the model to focus on capturing  
191 features that are specific to the heartbeat waveform, instead of inter-beat waveform variances.

192 Furthermore, we investigated the use of lead grouping as a preprocessing technique for  
193 improving the prediction accuracy of ECG signals. Specifically, we applied lead grouping on  
194 the 12-lead ECG signals based on their electrical orientation or anatomical location. For  
195 electrical orientation, 12-lead ECG signals are grouped into 2 separate groups based on  
196 horizontal and frontal planes (i.e., precordial and limb leads). For anatomical location, we  
197 formed 4 groups based on the distribution of coronary artery branches within the heart. Leads  
198 V1-V4 were grouped as leads related to the left anterior descending artery. Leads I, aVL, V5,  
199 and V6 were grouped as leads related to the left circumflex artery, whereas leads II, III, and  
200 aVF and lead aVR were related to the right coronary artery and the left main coronary artery,  
201 respectively.

202

### 203 **Feature Importance**

204 To better understand how different input data contribute to the overall prediction  
205 performance of our model, we designed three input combinations in our study. The first input  
206 set included only raw ECG signals, which is a commonly used and simple setting that can be  
207 applied to any 12-Lead ECG device and dataset. This setting served as a baseline for

208 comparison with more complex input sets. Demographic data was added to the second input  
209 set, as this information can provide a general description of physiological conditions that may  
210 affect electric conductance from the heart and heart functions. Demographic data are widely  
211 available in most clinical fields, making it a useful addition to the input set. Lastly, we included  
212 ECG axis and QRS duration information extracted from the XML files of ECG devices.  
213 However, this input combination may not always be available, as not all ECG devices provide  
214 this information.

215 By comparing the performance of the three input combinations, we were able to identify  
216 the contributions of each input data type to the overall prediction performance of our model.  
217 This allowed us to determine which input combinations were most effective for predicting  
218 LVM.

219

## 220 **Performance Analysis**

221 To evaluate the performance of the predicting model, mean absolute error (MAE) and  
222 mean absolute percentage error (MAPE) were utilized. These widely accepted metrics are  
223 commonly employed in regression analysis to gauge the accuracy of predicted values in  
224 comparison to actual values. MAPE calculates the absolute percentage difference between  
225 predicted and actual values and averages them over the dataset, while MAE measures the  
226 average absolute difference between the predicted and actual values.

227 We also used the saliency maps from the proposed framework to assess the importance  
228 of different ECG segments. Saliency maps are a type of visualization tool that can be generated  
229 from deep learning models to help understand how the model is making its predictions. These  
230 maps highlight the most important regions of input data that the model focuses on when making  
231 its prediction. In our case, saliency maps can be used to visualize which parts of the ECG signal  
232 are most important for the model's prediction. For the illustration of saliency maps, the ECG

233 signal was divided into non-overlapping segments, including the PR interval, QRS interval, ST  
234 segment, T-wave, and TP interval (**Figure S1**). Subsequently, the significance of each segment  
235 was determined by calculating the summation of their respective significance scores, which  
236 represent the overall segment significance.

## 237 **Results**

### 238 **Patient Characteristics**

239 The sex-specific patient characteristics are summarized in **Table 1**. Compared with  
240 female patients, male patients generally had wider QRS segments and more leftward axis, while  
241 also having higher LVM and LVM index. The correlation between LVM values and  
242 demographics, QRS duration, or axis is shown in **Figure S2**.

243

### 244 **Effect of ECG Grouping and Preprocessing Methods**

245 For the assessment of ECG preprocessing, data from both sexes were utilized as the  
246 training data, and electric orientation-based grouping was employed, whereas single-heartbeat  
247 extraction was utilized as the pre-processing technique for the assessment of different lead  
248 grouping methods.

249 The results of using different ECG preprocessing techniques are shown in **Table S1**. We  
250 found that the synchronized single heartbeat extraction can better improve the performance of  
251 the deep learning model in predicting LVM. Meanwhile, the experiments on lead grouping  
252 suggested that grouping based on electrical orientation had a significant impact on the  
253 performance of the model (**Table S2**).

254

### 255 **Feature Importance**

256 The results of different input combinations are shown in **Table 2**. Demographic data  
257 played a crucial role in predicting LVM using our model. The inclusion of demographic data  
258 significantly improved the prediction performance compared to using only raw ECG signals  
259 by 25.1% ( $P < 0.01$ ). Furthermore, the addition of the heart axis and QRS duration information  
260 provided an insignificant performance improvement (by an absolute difference of 0.7%,  
261  $P = 0.82$ ). In the real clinical setting, while demographic data are typically accessible, the  
262 availability of heart axis and QRS duration relies on the specific ECG device being used.  
263 Therefore, in the following experiments, both models were compared. The first model, named  
264 eLVMass-Net model 1, is trained using ECG and demographic data within the proposed  
265 framework. On the other hand, eLVMass-Net model 2 represents the proposed model trained  
266 with ECG, demographic data, heart axis, and QRS duration, encompassing a more  
267 comprehensive set of input features.

268

### 269 **Comparison with The State-of-The-Art Methods and Sex-Specific Analysis**

270 We conducted performance comparisons using two different feature sets. The first  
271 setting followed the original configuration of the state-of-the-art (SOTA) methods, which  
272 involved specific method designs that were incompatible with our proposed eLVMass-Net.  
273 And in the second setting, all available features (ECG signals, demographic data, heart axis,  
274 and QRS durations) are used, showcasing the advantages of our approach while improving the  
275 SOTA methods as well.

276 For the non-sex-specific models, the performance metrics of our proposed method and  
277 the other SOTA methods are summarized in **Table 3**. As can be seen from the table, the  
278 proposed method has achieved the lowest mean absolute error (MAE) of 14.33 and mean  
279 absolute percentage error (MAPE) of 12.90% among all the methods. On the other hand, the  
280 SOTA methods have MAE and MAPE of 19.51 and 17.62%, respectively.

281 In the sex-specific analysis, each sex-specific model was trained and evaluated on sex-  
282 specific data subsets. The performance metrics for the sex-specific models with the proposed  
283 method and the other SOTA methods are summarized in **Table 4**. It's observed that all methods  
284 are able to achieve a lower MAPE on the sex-specific dataset. Both eLVMass-Net Model 1 and  
285 eLVMass-Net Model 2 outperform the SOTA method (LVM-AI) by at least 3.68% ( $P < 0.01$ )  
286 and 2.21% ( $P = 0.20$ ) in terms of MAPE for males and females, respectively. The results also  
287 indicated that models tend to have higher MAE for males and lower MAE for females  
288 compared to the MAE for the overall test set. This observation can be attributed to the higher  
289 average LVM value of males compared to females. When compared to the non-sex-specific  
290 model, the sex-specific model demonstrates a relative improvement of 2.71% in terms of  
291 MAPE for males ( $P = 0.30$ ), and a relative improvement of 2.95% for females ( $P = 0.10$ ).  
292 (**Table S3**)

293 Samples ( $n=5$  for each) of low, medium, and high LVM values were selected. The mid  
294 part of the T wave in precordial leads and the QRS segment in limb leads are highlighted as  
295 important features with increasing LVM. **Table 5** presents a non-sex-specific summary of the  
296 segment-wise significance of the input ECG. It shows that the importance is mainly  
297 concentrated in QRS interval and T-wave. Furthermore, the importance of precordial leads  
298 decreased as the LV mass value increased (62.16% for the low LVM group and 40.02% for the  
299 high LVM group).

300 The segment-wise importance for sex-specific model is shown separately in **Table 6**.  
301 The saliency map for sex-specific model is illustrated in **Figure 3**. Notably, the importance of  
302 T waves experiences a proportional augmentation for males with increasing LVM values  
303 (3.36% for low LVM to 25.44% for high LVM). This trend has not been observed in females  
304 (0.84% in low LVM to 0.66% in high LVM). Conversely, female presented with persistently

305 higher significance of the precordial QRS segment (62.26% in low LVM to 54.32% in high  
306 LVM).

## 307 **Discussion**

308 The eLVMass-Net was trained on CT-derived LVM values, 12-lead ECG, and  
309 demographic information of around 1,500 individual patients. Our study showed that this ECG-  
310 grouping-based and demographic-inclusive model outperforms other state-of-the-art deep  
311 learning models for LVM estimation. The addition of scalar ECG features such as QRS  
312 duration and axis provided insignificant improvement for model performance. Additionally,  
313 the sex-specific eLVMass-Net model showed tendency towards better prediction performance  
314 than the non-sex-specific model. The alterations in both QRS and T wave voltages associated  
315 with increasing LVM may be disparate between both genders.

316 Our proposed method is effective in predicting LVM values using ECG signals and  
317 demographic data as inputs. In the case of the LVM-AI model, the observation of overfitting  
318 during training suggests that the model may be too complex or not regularized enough for the  
319 size of the dataset used in training. It means that the model has learned to fit the training data  
320 very well but needs to generalize better to new data. Compared with the performance between  
321 our proposed method and LVM-AI, ours improved by 27% for MAE and MAPE. On the other  
322 hand, the ECG segmentation labels are necessary for the ecgAI training pipeline, which is not  
323 available in the original XML files. When applying ecgAI on other datasets, additional effort  
324 is needed to label ECG segments or the model for the segmentation task. The LVM estimation  
325 task will be trained on separate datasets. The experimental results suggest that using a separate  
326 dataset for training the ECG segmentation model may have contributed to the low performance  
327 of the ecgAI model on our dataset. It may be due to differences in data distribution, recording

328 devices, or preprocessing steps between the two datasets. Therefore, our proposed method  
329 shows a relative improvement of 33% for MAE and MAPE compared to ecgAI.

330 The results of this study are to be further interpreted in the clinical context. First, our  
331 proposed model focuses more on the QRS interval of limb leads and T wave in precordial leads  
332 with increasing LVM. It is proposed that a hypertrophied heart grows disproportionately  
333 towards the inferior, leftward, and posterior axes.<sup>23,24</sup> Also, T-wave abnormalities may reflect  
334 the severity of left ventricular hypertrophy. Respectively integrating both precordial- and limb-  
335 lead features by individual encoders may further increase the diagnostic accuracy.<sup>25,26</sup> Second,  
336 previous studies indicated that sex difference exists in QRS duration and voltage regardless of  
337 baseline body size or left ventricular mass.<sup>16,27</sup> Even with similar comorbidities or disease  
338 severity, there are significant differences in terms of left ventricular mass and extent of  
339 myocardial fibrosis between sexes.<sup>28,29</sup> The sex-specific model revealed notable improvement  
340 in terms of MAPE for predicting LVM compared with the non-sex-specific model. There were  
341 distinct differences in segment-wise importance associated with increasing LVM between men  
342 and women. Likewise, it was demonstrated that the presentation of either T wave inversions in  
343 men or increased precordial voltage in women is associated with heart failure hospitalization.<sup>30</sup>  
344 It is possible that currently developed deep learning algorithms are able to detect important  
345 sex-specific pathophysiological differences.<sup>31</sup>

346 Despite the promising results and contributions of this study, the notable limitation is  
347 the absence of external validation data. Although we conducted rigorous experiments and  
348 evaluations using carefully curated datasets, the lack of external validation hinders the  
349 generalizability of our findings to different populations or datasets. External validation data  
350 would provide a valuable opportunity to assess the performance and robustness of our  
351 proposed method on unseen and diverse datasets, ensuring its applicability in real-world



352 scenarios. Future research should focus on obtaining and incorporating external validation  
353 data to further validate and enhance the reliability and generalizability of our approach.

## 354 **Conclusions**

355 Accurate assessment of LVM is crucial in diagnosing and managing cardiovascular  
356 diseases. We proposed eLVMass-Net as a novel approach that includes relevant heartbeat  
357 waveforms, inter-lead grouping, and demographic information for LVM estimation. Our model  
358 architecture incorporates pre-processing techniques that focus on synchronized heartbeat  
359 waveforms and ECG groups based on different projection planes to improve the understanding  
360 of their relationships. For sex disparities, the sex-specific model is able to discriminate  
361 important ECG features associated with left ventricular mass.

## 362 **Sources of Funding**

363 Supported by a research grant from National Science and Technology Council, Taiwan  
364 (R.O.C.) (MOST 111-2314-B-002-275).

## 365 **Disclosures**

366 None.

## 367 **References**

- 368 1. Kostin S, Dammer S, Hein S, et al. Connexin 43 expression and distribution in  
369 compensated and decompensated cardiac hypertrophy in patients with aortic stenosis.  
370 *Cardiovasc Res* 2004;62:426-36.
- 371 2. Nakamura M and Sadoshima J. Mechanisms of physiological and pathological cardiac  
372 hypertrophy. *Nat Rev Cardiol* 2018;15:387-407.

- 373 3. Chatterjee S, Bavishi C, Sardar P, et al. Meta-analysis of left ventricular hypertrophy and  
374 sustained arrhythmias. *Am J Cardiol* 2014;114:1049-52.
- 375 4. Chrispin J, Jain A, Soliman EZ, et al. Association of electrocardiographic and imaging  
376 surrogates of left ventricular hypertrophy with incident atrial fibrillation: Mesa (multi-ethnic  
377 study of atherosclerosis). *J Am Coll Cardiol* 2014;63:2007-13.
- 378 5. Oparil S, Acelajado MC, Bakris GL, et al. Hypertension. *Nat Rev Dis Primers*  
379 2018;4:18014.
- 380 6. Hancock EW, Deal BJ, Mirvis DM, et al. AHA/ACCF/HRS recommendations for the  
381 standardization and interpretation of the electrocardiogram: Part V: Electrocardiogram changes  
382 associated with cardiac chamber hypertrophy: A scientific statement from the american heart  
383 association electrocardiography and arrhythmias committee, council on clinical cardiology; the  
384 american college of cardiology foundation; and the heart rhythm society. Endorsed by the  
385 international society for computerized electrocardiology. *J Am Coll Cardiol* 2009;53:992-1002.
- 386 7. Bayram N, Akoğlu H, Sanri E, et al. Diagnostic accuracy of the electrocardiography  
387 criteria for left ventricular hypertrophy (cornell voltage criteria, sokolow-lyon index, romhilt-  
388 estes, and peguero-lo presti criteria) compared to transthoracic echocardiography. *Cureus*  
389 2021;13:e13883.
- 390 8. Tavares CAM, Samesima N, Hajjar LA, et al. Clinical applicability and diagnostic  
391 performance of electrocardiographic criteria for left ventricular hypertrophy diagnosis in older  
392 adults. *Sci Rep* 2021;11:11516.
- 393 9. Hamed M, Dasari G, Casale JA, et al. The use of romhilt-estes criteria in the presumptive  
394 electrocardiographic diagnosis of left ventricular hypertrophy in comparison to voltage-based  
395 criteria. *Cureus* 2022;14:e28003.
- 396 10. Dohy Z, Vereckei A, Horvath V, et al. How are ecg parameters related to cardiac magnetic  
397 resonance images? Electrocardiographic predictors of left ventricular hypertrophy and

- 398 myocardial fibrosis in hypertrophic cardiomyopathy. *Ann Noninvasive Electrocardiol*  
399 2020;25:e12763.
- 400 11. Bacharova L. ECG in left ventricular hypertrophy: A change in paradigm from assessing  
401 left ventricular mass to its electrophysiological properties. *J Electrocardiol* 2022;73:153-6.
- 402 12. Klein R, Ametepe ES, Yam Y, et al. Cardiac ct assessment of left ventricular mass in mid-  
403 diastasis and its prognostic value. *Eur Heart J Cardiovasc Imaging* 2017;18:95-102.
- 404 13. Raff GL, Abidov A, Achenbach S, et al. SCCT guidelines for the interpretation and  
405 reporting of coronary computed tomographic angiography. *J Cardiovasc Comput Tomogr*  
406 2009;3:122-36.
- 407 14. Tison GH, Zhang J, Delling FN, et al. Automated and interpretable patient ECG profiles  
408 for disease detection, tracking, and discovery. *Circ Cardiovasc Qual Outcomes*  
409 2019;12:e005289.
- 410 15. Kwon JM, Jeon KH, Kim HM, et al. Comparing the performance of artificial intelligence  
411 and conventional diagnosis criteria for detecting left ventricular hypertrophy using  
412 electrocardiography. *Europace* 2020;22:412-9.
- 413 16. Khurshid S, Friedman S, Pirruccello JP, et al. Deep learning to predict cardiac magnetic  
414 resonance-derived left ventricular mass and hypertrophy from 12-lead ECGs. *Circulation:  
415 Cardiovascular Imaging* 2021;14:e012281.
- 416 17. Al Hinai G, Jammoul S, Vajihi Z, et al. Deep learning analysis of resting  
417 electrocardiograms for the detection of myocardial dysfunction, hypertrophy, and ischaemia:  
418 A systematic review. *Eur Heart J Digit Health* 2021;2:416-23.
- 419 18. Liu C-M, Hsieh M-E, Hu Y-F, et al. Artificial intelligence-enabled model for early  
420 detection of left ventricular hypertrophy and mortality prediction in young to middle-aged  
421 adults. *Circulation: Cardiovascular Quality and Outcomes* 2022;15.

- 422 19. Okin PM, Hille DA, Kjeldsen SE, et al. Combining ECG criteria for left ventricular  
423 hypertrophy improves risk prediction in patients with hypertension. *J Am Heart Assoc* 2017;6.
- 424 20. Tan M and Le Q. Efficientnet: Rethinking model scaling for convolutional neural  
425 networks. *International conference on machine learning* 2019:6105-14.
- 426 21. Bai S, Kolter JZ and Koltun V. An empirical evaluation of generic convolutional and  
427 recurrent networks for sequence modeling. *arXiv preprint arXiv:180301271* 2018.
- 428 22. Nonaka N and Seita J. Electrocardiogram classification by modified efficientnet with data  
429 augmentation. *2020 Computing in Cardiology* 2020:1-4.
- 430 23. Peguero JG, Lo Presti S, Perez J, et al. Electrocardiographic criteria for the diagnosis of  
431 left ventricular hypertrophy. *J Am Coll Cardiol* 2017;69:1694-703.
- 432 24. Yu Z, Song J, Cheng L, et al. Peguero-Lo Presti criteria for the diagnosis of left ventricular  
433 hypertrophy: A systematic review and meta-analysis. *PLoS One* 2021;16:e0246305.
- 434 25. Budkiewicz A, Surdacki MA, Gamrat A, et al. Electrocardiographic versus  
435 echocardiographic left ventricular hypertrophy in severe aortic stenosis. *J Clin Med* 2021;10.
- 436 26. Su FY, Li YH, Lin YP, et al. A comparison of Cornell and Sokolow-Lyon  
437 electrocardiographic criteria for left ventricular hypertrophy in a military male population in  
438 taiwan: The cardiorespiratory fitness and hospitalization events in armed forces study.  
439 *Cardiovasc Diagn Ther* 2017;7:244-51.
- 440 27. Okin PM, Roman MJ, Devereux RB, et al. Gender differences and the electrocardiogram  
441 in left ventricular hypertrophy. *Hypertension* 1995;25:242-9.
- 442 28. Tadic M, Cuspidi C, Celic V, et al. The influence of sex on left ventricular strain in  
443 hypertensive population. *J Hypertens* 2019;37:50-6.
- 444 29. Tastet L, Kwiecinski J, Pibarot P, et al. Sex-related differences in the extent of myocardial  
445 fibrosis in patients with aortic valve stenosis. *JACC Cardiovasc Imaging* 2020;13:699-711.

446 30. Haukilahti MAE, Kenttä TV, Tikkanen JT, et al. Electrocardiographic risk markers for  
447 heart failure in women versus men. *Am J Cardiol* 2020;130:70-7.

448 31. Attia ZI, Friedman PA, Noseworthy PA, et al. Age and sex estimation using artificial  
449 intelligence from standard 12-lead ECGs. *Circ Arrhythm Electrophysiol* 2019;12:e007284.

450

## 451 **Figure Legend**

452 Figure 1. Overview of the dataset collection. The CT data and corresponding XML files were  
453 collected independently. Therefore, a matching process was carried out based on the  
454 requirement that both measurements be taken within six months. Patients with bundle branch  
455 block (BBB), paced rhythm, and atrial fibrillation (AF) were excluded due to distorted ECG  
456 waveforms. Additionally, ECG recordings that did not have a one-to-one paired LVM  
457 measurement were also excluded. As a result, a total of 1,459 valid data points were included  
458 in this study.

459 Figure 2. Overview of the proposed LVM estimation framework. The proposed LVM  
460 prediction model consists of separate encoders for the limb leads and chest leads of the 12-  
461 lead ECG, followed by a multilayer perceptron (MLP) layer. Additionally, scalar features  
462 such as demographic data, heart axis, and QRS duration are passed through their own MLP  
463 layer. The encoded ECG features and scalar features are then concatenated and fed into the  
464 prediction layer to estimate the LVM.

465 Figure 3. Saliency maps of the proposed prediction module. Three samples were selected to  
466 represent low, middle, and high LVM values for both males and females.

467

468 **Tables**

|                                   | <b>Male (n = 940)</b> | <b>Female (n = 519)</b> | <b>P value</b> |
|-----------------------------------|-----------------------|-------------------------|----------------|
| LV mass (g)                       | 123.29 ( $\pm$ 29.88) | 85.21 ( $\pm$ 21.41)    | <0.01          |
| LV mass index (g/m <sup>2</sup> ) | 67.43 ( $\pm$ 14.71)  | 52.98 ( $\pm$ 13.02)    | <0.01          |
| Age                               | 60.29 ( $\pm$ 11.29)  | 62.99 ( $\pm$ 11.15)    | <0.01          |
| Height                            | 168.59 ( $\pm$ 6.12)  | 158.16 ( $\pm$ 6.39)    | <0.01          |
| Weight                            | 72.86 ( $\pm$ 11.53)  | 60.47 ( $\pm$ 9.36)     | <0.01          |
| QRS-Duration                      | 93.86 ( $\pm$ 10.74)  | 86.26 ( $\pm$ 9.63)     | <0.01          |
| P-Axis                            | 49.52 ( $\pm$ 20.76)  | 49.85 ( $\pm$ 23.30)    | 0.78           |
| R-Axis                            | 28.45 ( $\pm$ 35.37)  | 36.79 ( $\pm$ 34.21)    | <0.01          |
| T-Axis                            | 40.29 ( $\pm$ 32.98)  | 43.47 ( $\pm$ 33.05)    | 0.08           |

469 Table 1. Characteristics for the dataset.

470

| Feature Combinations                               | MAE              |                      | P-Value | MAPE               |                      | P-Value |
|----------------------------------------------------|------------------|----------------------|---------|--------------------|----------------------|---------|
|                                                    | MAE              | Relative Improvement |         | MAPE               | Relative Improvement |         |
| ECG                                                | 19.22<br>(±0.91) | -                    | <0.01   | 17.39%<br>(±1.39%) | -                    | 0.02    |
| ECG + Demographics<br>(eLVMass-Net model 1)        | 14.56<br>(±0.53) | 24.2%                | 0.82    | 13.03%<br>(±1.00%) | 25.1%                | 0.85    |
| ECG + Demographics + Axis<br>(eLVMass-Net model 2) | 14.33<br>(±0.71) | 25.4%                |         | 12.90%<br>(±1.12%) | 25.8%                | -       |

471 Table 2. LVM prediction performance using different input combinations. The relative  
472 improvements were computed by comparing the results obtained from the multimodal models  
473 with those of the ECG-only model. Furthermore, the P-values were calculated by comparing  
474 these methods to the outcomes of eLVMass-Net model 2.

475

| Model Name                                         | MAE              |                  | P-Value | MAPE               |                    | P-Value |
|----------------------------------------------------|------------------|------------------|---------|--------------------|--------------------|---------|
|                                                    | Original Setting | All Features     |         | Original Setting   | All Features       |         |
| ecgAI                                              | 29.62<br>(±0.93) | 21.28<br>(±0.36) | <0.01   | 26.85%<br>(±1.15%) | 19.12%<br>(±0.56%) | <0.01   |
| LVM-AI                                             | 19.58<br>(±0.94) | 19.51<br>(±0.82) | 0.04    | 17.52%<br>(±1.25%) | 17.62%<br>(±0.78%) | 0.07    |
| eLVMass-Net model 1<br>(ECG + Demographics)        | -                | 14.56<br>(±0.53) | 0.82    | -                  | 13.03%<br>(±1.00%) | 0.85    |
| eLVMass-Net model 2<br>(ECG + Demographics + Axis) | -                | 14.33<br>(±0.71) |         | -                  | 12.90%<br>(±1.12%) | -       |

476 Table 3. The performance of the proposed prediction module and the SOTA models (testing  
477 sample  $n = 292 \pm 1$ ). The P-values were computed by comparing these methods to the results  
478 of eLVMass-Net model 2.  
479



| Model Name             | MAE              |                  |                  | P-Value<br>(Male<br>/Female) | MAPE               |                    |                    | P-Value<br>(Male<br>/Female) |
|------------------------|------------------|------------------|------------------|------------------------------|--------------------|--------------------|--------------------|------------------------------|
|                        | Non-sex-specific | Male             | Female           |                              | Non-sex-specific   | Male               | Female             |                              |
| ecgAI                  | 21.28<br>(±0.36) | 23.93<br>(±0.29) | 15.92<br>(±1.13) | <0.01 / 0.02                 | 19.12%<br>(±0.56%) | 19.34%<br>(±0.28%) | 18.42%<br>(±1.34%) | <0.01 / <0.01                |
| LVM-AI                 | 19.51<br>(±0.82) | 21.13<br>(±1.06) | 13.33<br>(±1.45) | 0.02 / 0.22                  | 17.62%<br>(±0.78%) | 16.42%<br>(±0.98%) | 14.85%<br>(±1.20%) | <0.01 / 0.20                 |
| eLVMass-Net<br>Model 1 | 14.56<br>(±0.53) | 16.41<br>(±0.63) | 11.12<br>(±0.63) | 0.78 / 0.83                  | 13.03%<br>(±1.00%) | 12.74%<br>(±0.68%) | 12.64%<br>(±0.53%) | 0.74 / 0.77                  |
| eLVMass-Net<br>Model 2 | 14.33<br>(±0.71) | 16.05<br>(±0.75) | 11.02<br>(±0.71) | -                            | 12.90%<br>(±1.12%) | 12.55%<br>(±0.88%) | 12.52%<br>(±0.34%) |                              |

480 Table 4. Sex-specific model performances of proposed prediction module and SOTA models

481 (testing sample  $n = 292 \pm 1$ ). The P-values were computed by comparing these methods to the

482 results of eLVMass-Net model 2.

483

484

|                     | <b>Non-sex-specific</b> |                  |               |                  |             |                  |
|---------------------|-------------------------|------------------|---------------|------------------|-------------|------------------|
| <b>LV mass</b>      | <b>Low</b>              |                  | <b>Middle</b> |                  | <b>High</b> |                  |
|                     | Limb-leads              | Precordial-leads | Limb-leads    | Precordial-leads | Limb-leads  | Precordial-leads |
| <b>PR interval</b>  | 3.52%                   | 0.52%            | 3.16%         | 0.06%            | 3.90%       | 0.00%            |
| <b>QRS interval</b> | 34.32%                  | 42.90%           | 37.96%        | 41.78%           | 53.28%      | 17.52%           |
| <b>ST segment</b>   | 0.00%                   | 11.08%           | 0.00%         | 16.62%           | 0.04%       | 0.08%            |
| <b>T wave</b>       | 0.00%                   | 6.52%            | 0.00%         | 0.00%            | 2.76%       | 22.42%           |
| <b>TP interval</b>  | 0.00%                   | 1.18%            | 0.48%         | 0.00%            | 0.00%       | 0.00%            |
| <b>Total</b>        | 37.84%                  | 62.16%           | 41.58%        | 58.42%           | 59.98%      | 40.02%           |

485 Table 5. ECG-segment-wise importance for each segment from saliency maps from the non-

486 sex-specific model. The percentages were the averages from 5 samples.

487

|                     | Male       |                  |            |                  |            |                  | Female     |                  |            |                  |            |                  |
|---------------------|------------|------------------|------------|------------------|------------|------------------|------------|------------------|------------|------------------|------------|------------------|
| LV mass             | Low        |                  | Middle     |                  | High       |                  | Low        |                  | Middle     |                  | High       |                  |
|                     | Limb-leads | Precordial-leads | Limb-leads | Precordial-leads | Limb-leads | Precordial-leads | Limb-leads | Precordial-leads | Limb-leads | Precordial-leads | Limb-leads | Precordial-leads |
| <b>PR interval</b>  | 1.0%       | 0.0%             | 0.5%       | 0.0%             | 0.2%       | 0.0%             | 0.0%       | 0.0%             | 4.4%       | 0.0%             | 1.5%       | 0.4%             |
| <b>QRS interval</b> | 34.8%      | 53.7%            | 39.0%      | 22.8%            | 49.2%      | 9.2%             | 36.5%      | 49.2%            | 34.5%      | 30.8%            | 54.7%      | 26.3%            |
| <b>ST segment</b>   | 0.0%       | 10.5%            | 0.0%       | 7.4%             | 0.0%       | 0.0%             | 0.0%       | 0.0%             | 0.0%       | 8.4%             | 0.0%       | 1.2%             |
| <b>T wave</b>       | 0.0%       | 0.0%             | 0.0%       | 30.3%            | 7.0%       | 34.5%            | 0.0%       | 14.3%            | 0.0%       | 21.9%            | 0.0%       | 16.0%            |
| <b>TP interval</b>  | 0.0%       | 0.0%             | 0.0%       | 0.0%             | 0.0%       | 0.0%             | 0.0%       | 0.0%             | 0.0%       | 0.0%             | 0.0%       | 0.0%             |
| <b>Total</b>        | 35.8%      | 64.2%            | 39.5%      | 60.5%            | 56.4%      | 43.6%            | 36.5%      | 63.5%            | 38.9%      | 61.1%            | 56.2%      | 43.8%            |

488 Table 6. ECG-segment-wise importance for each segment from saliency maps from the sex-

489 specific models. The percentages were the averages from 5 samples.

490

491 **Figures**

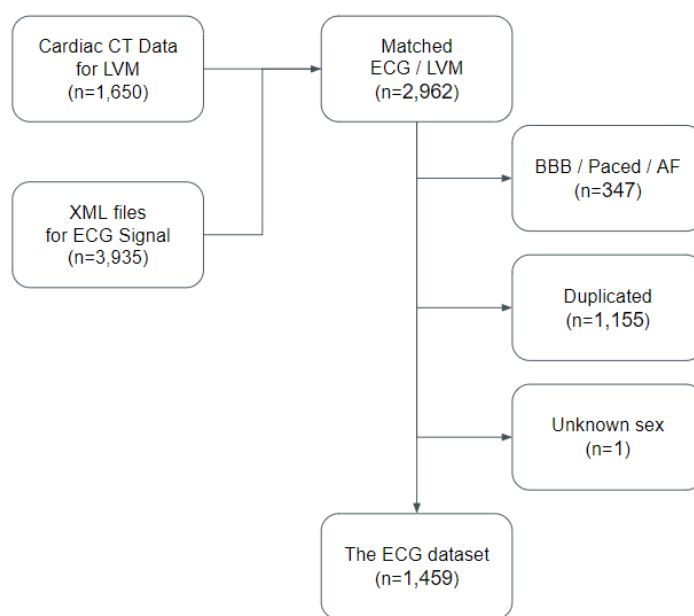

492

493 Figure 1.

494

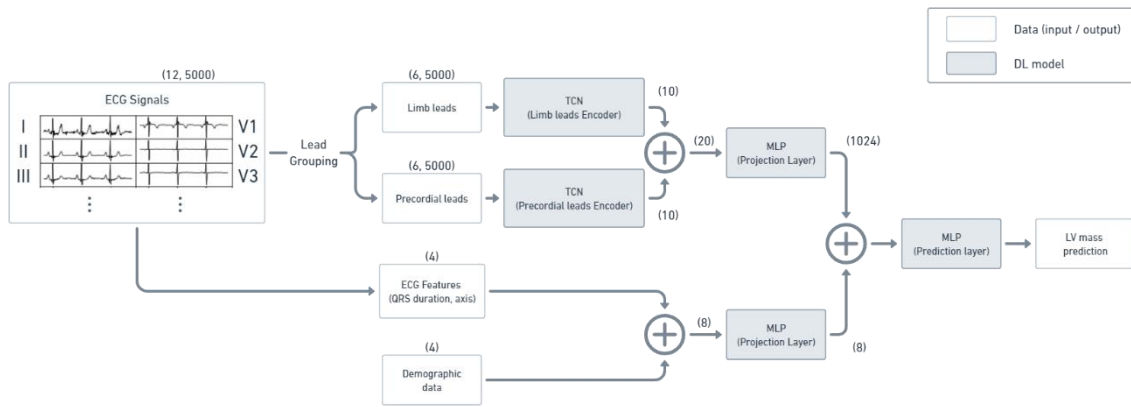

495

496 Figure 2.

497

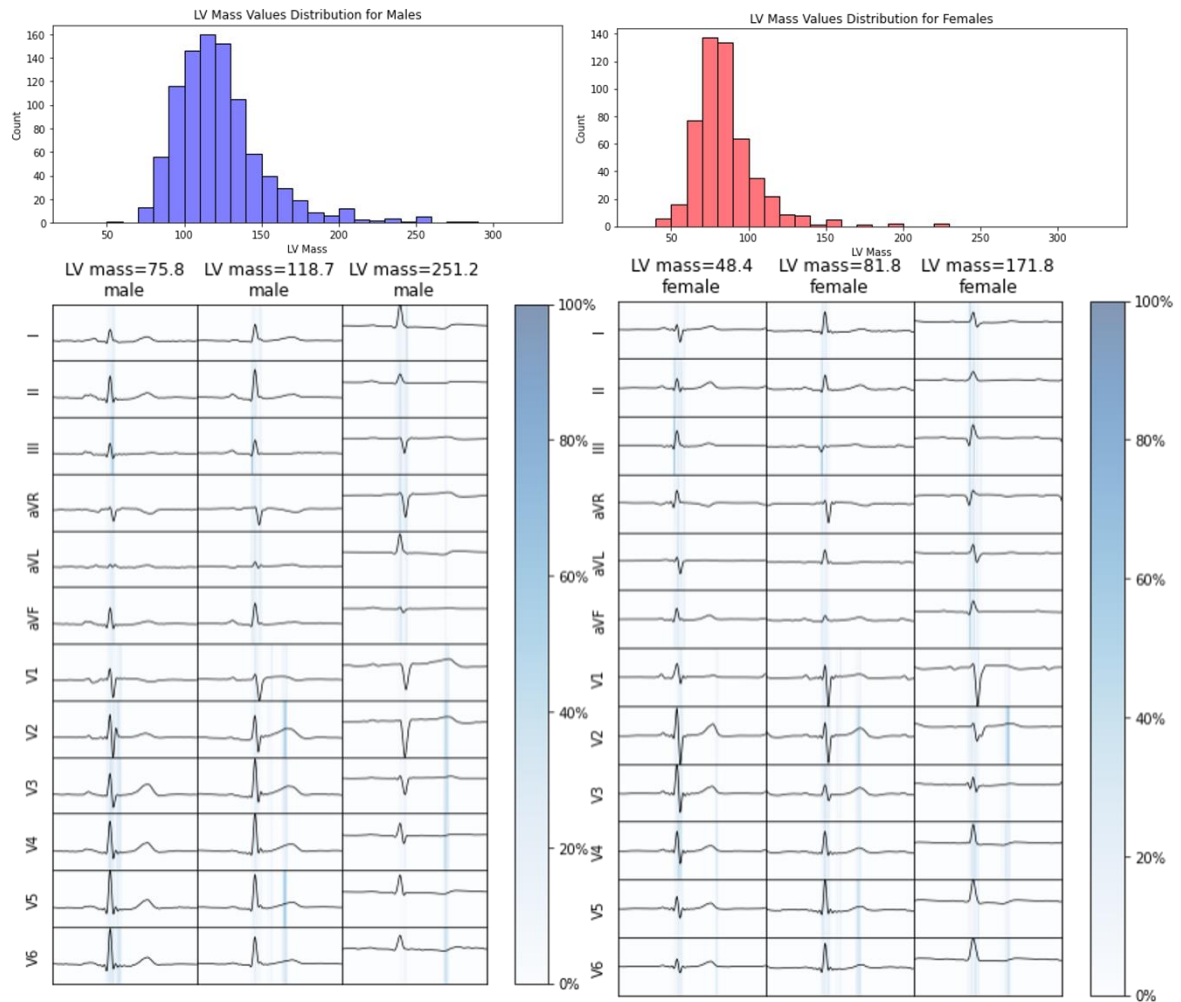

498

499

Figure 3.

500
